# Supplementary material
Source: publisher site journal article supplement (https://www.spandidos-publications.com/2860/downloadSupplementary)

Figure S1. TMEM100 expression level is positively correlated with the prognosis of patients with NSCLC. (A) Kaplan-Meier analysis of patients with different expression level of TMEM100 in The Cancer Genome Atlas database. (B) Overall survival rate of patients with NSCLC according to the expression of TMEM100 in the online database Kaplan-Meier Plotter. NSCLC, non-small cell lung cancer; TMEM100, transmembrane protein 100; HR, hazard ratio.

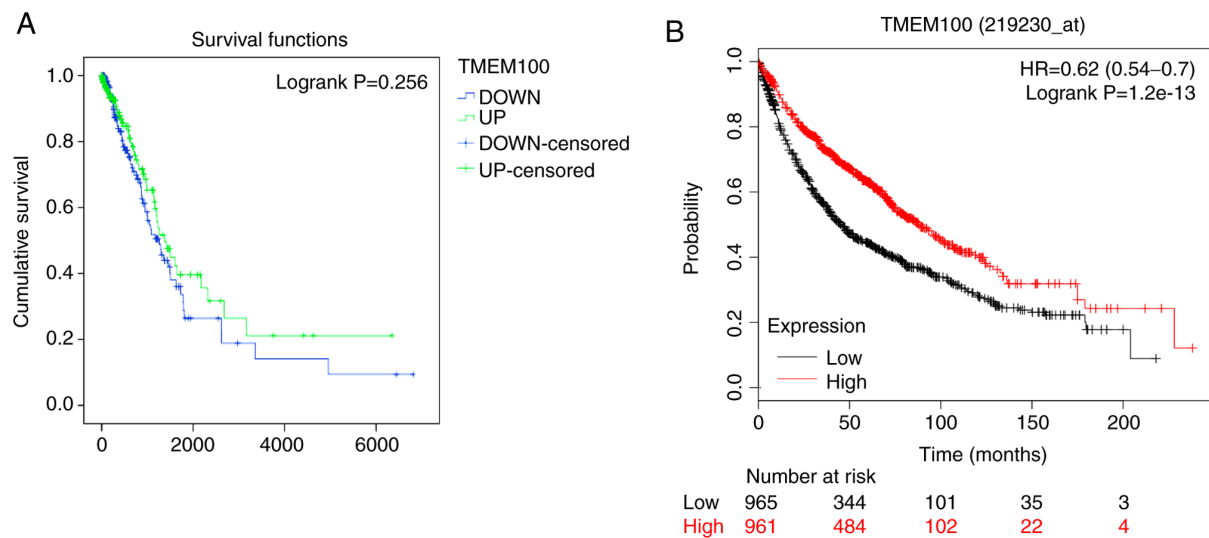

Figure S2. Knock-down of TMEM100 promotes the proliferation of H460 cells. (A) Expression level of TMEM100 gene in H460 cells transfected with TMEM100 siRNAs. (B) Expression level of TMEM100 protein in si-TMEM100-transfected H460 cells. (C) Cell Counting Kit-8 assay in H460 cells following knock-down of TMEM100. Data are representative of three independent experiments and are presented as the mean  $\pm$  SD. \*\* $P < 0.01$  and \*\*\* $P < 0.001$  vs. si-NC. TMEM100, transmembrane protein 100; si, small interfering; NC, negative control; OD, optical density.

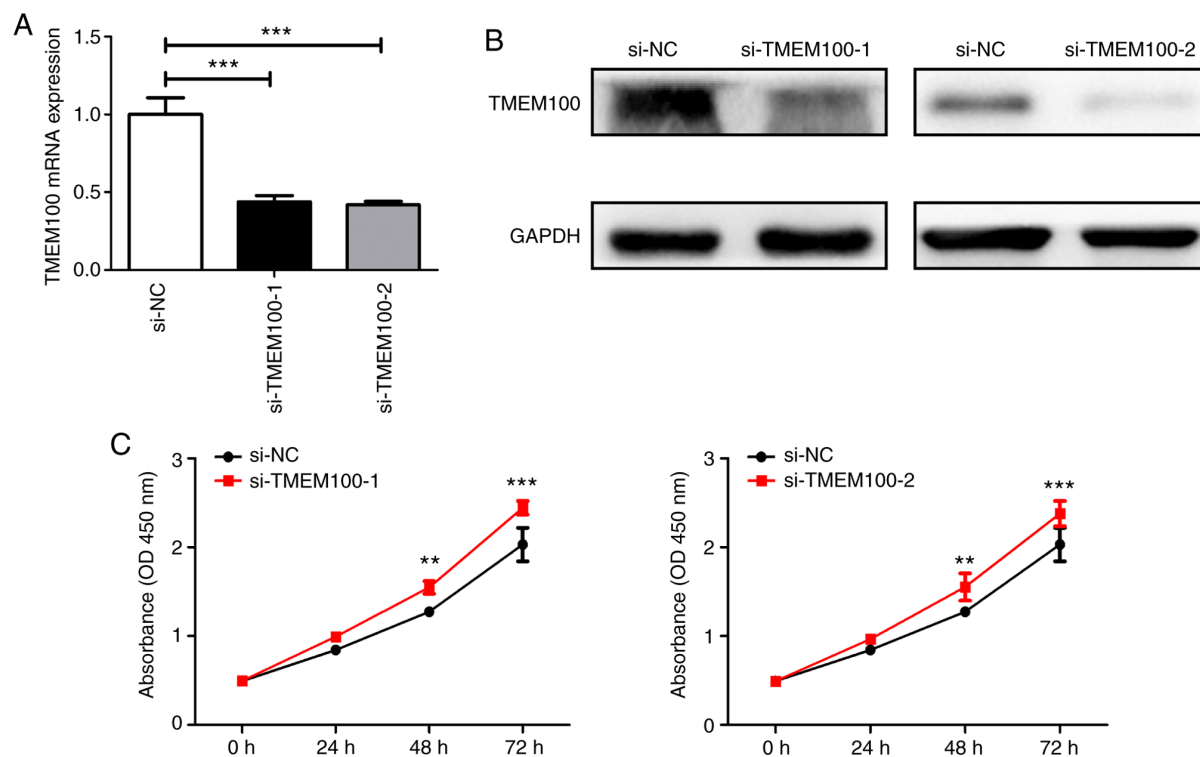

Figure S3. Knock-down of TMEM100 inhibits apoptosis in H460 cells. (A) Flow cytometric analysis of cell apoptosis in H460 cells transfected with TMEM100 siRNAs. (B) Expression level of the apoptosis-related proteins BAX and BCL2 in H460 cells following knock-down of TMEM100. Data are representative of three independent experiments and are presented as the mean  $\pm$  SD. \* $P < 0.05$ . TMEM100, transmembrane protein 100; si, small interfering; NC, negative control.

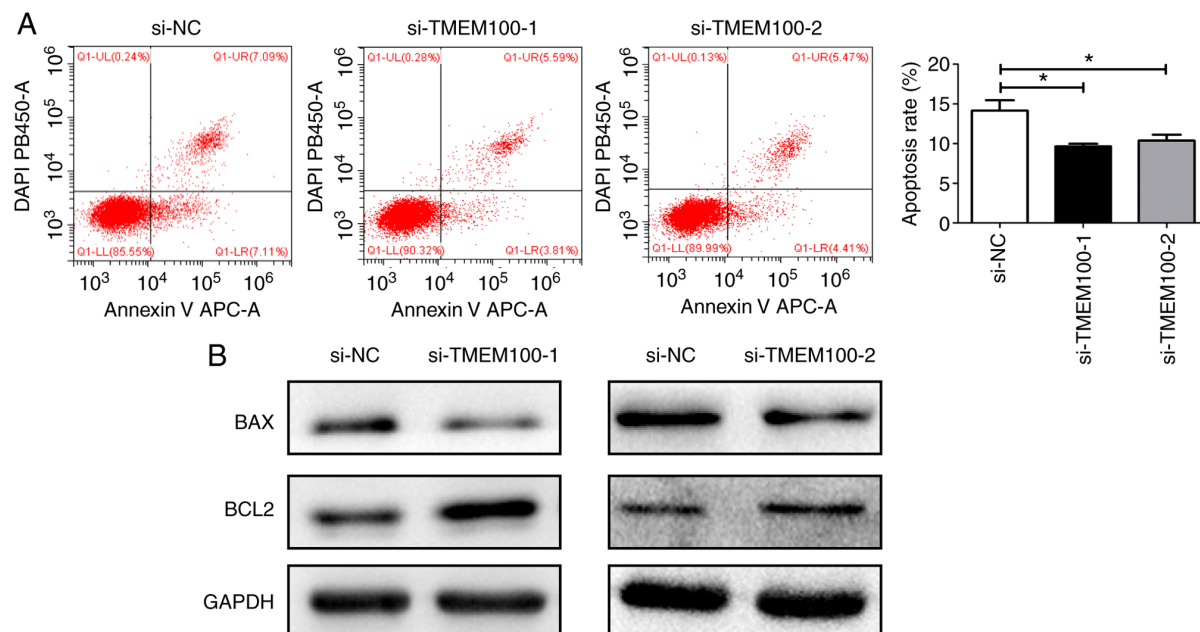

Figure S4. Knock-down of TMEM100 inhibits autophagy in H460 cells by activating the PI3K/AKT signaling pathway. (A) Expression level of the autophagy markers LC3 and p62 in H460 cells following knock-down of TMEM100. (B) Phosphorylation level of PI3K and AKT in H460 cells transfected with TMEM100 siRNAs. (C) Expression level of LC3 and phosphorylation level of PI3K in H460 cells transfected with si-NC or si-TMEM100-1, with or without treatment with LY4294002, a PI3K inhibitor. Data are representative of three independent experiments. TMEM100, transmembrane protein 100; si, small interfering; NC, negative control; p, phosphorylated; t, total.

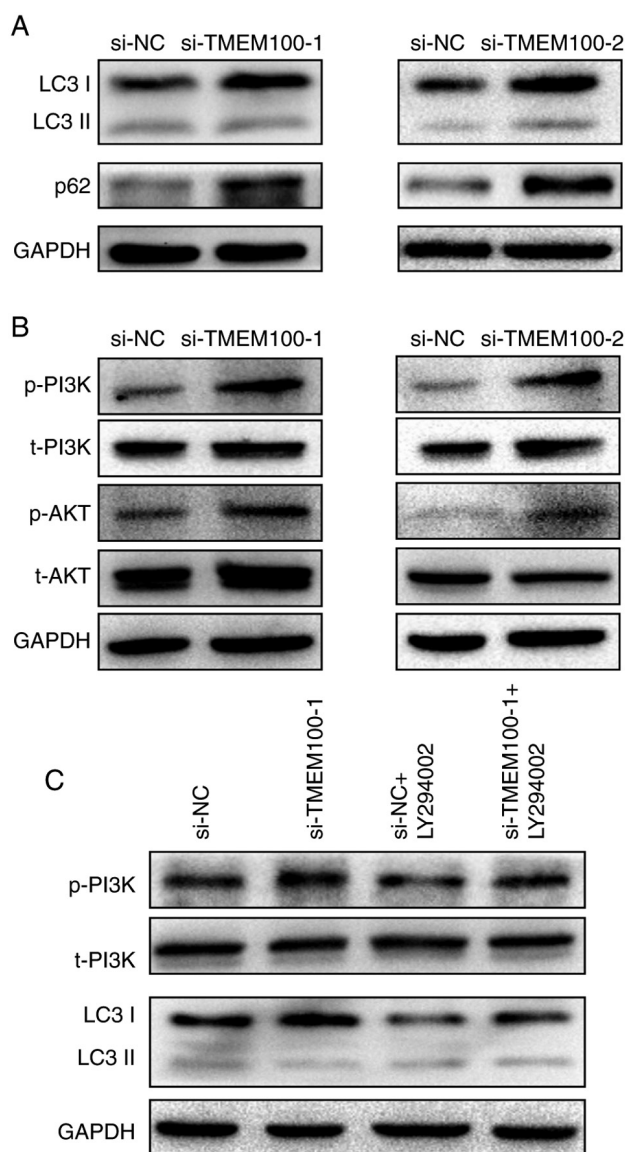

Supplement: Supplementary file 1 [file downloadSupplementary]
